# Supplementary material for: Theoretical insights into the intercalation mechanism of Li, Na, and Mg ions in a metallic BN/VS2 heterostructure
Source: Royal Society of Chemistry journal article supplement (doi:10.1039/d3cp05232j), 2024-01-01
Supplement: d3cp05232j1.pdf [file d3cp05232j1.pdf]

## Supplementary Information

# Theoretical Insights into the Intercalation Mechanisms of Li, Na and Mg ions in Metallic BN/VS<sub>2</sub> Heterostructure

*Lingxiao Luo<sup>a,b</sup>, Shuangshuang Tan<sup>a,b,\*</sup>, Zhipeng Gao<sup>a,b</sup>, Xiaofang Yang<sup>a,b,\*</sup>, Junyao Xu<sup>a,b,\*</sup>, Guangsheng Huang<sup>a,b</sup>, Jingfeng Wang<sup>a,b</sup>, Fusheng Pan<sup>a,b</sup>*

<sup>a</sup> College of Materials Science and Engineering, Chongqing University, Chongqing 400044, P. R. China.

<sup>b</sup> National Engineering Research Center for Magnesium Alloys, Chongqing University, Chongqing 400044, China.

\*Corresponding Author

Shuangshuang Tan: [tss@cqu.edu.cn](mailto:tss@cqu.edu.cn)

Xiaofang Yang: [yangxf@cqu.edu.cn](mailto:yangxf@cqu.edu.cn)

Junyao Xu: [junyaouxu@cqu.edu.cn](mailto:junyaouxu@cqu.edu.cn)

**Table S1** Formation energy values of different materials

| Type               | layer           | $E_b$ (meV) |
|--------------------|-----------------|-------------|
| BN                 | Monolayer       | -280.658    |
| VS <sub>2</sub>    | Monolayer       | -182.467    |
| BN/VS <sub>2</sub> | Heterostructure | -468.935    |

**Table S2** Energy band values of different materials

---

| <b>Type</b>              | <b>Special side (A)</b> | <b>Site</b>      | <b>Energy (eV)</b> |
|--------------------------|-------------------------|------------------|--------------------|
| <b>Monolayer</b>         | 0.000000                | Conduction band  | 4.70373            |
| <b>BN</b>                |                         | base             |                    |
|                          | 0.000000                | Valence band top | 0.03459            |
| <b>Monolayer</b>         | 0.129002                | Conduction band  | 2.04720            |
| <b>VS<sub>2</sub></b>    |                         | base             |                    |
|                          | 0.129002                | Valence band top | 1.29370            |
| <b>BN/VS<sub>2</sub></b> | 0.093666                | Conduction band  | 0.08304            |
|                          |                         | base             |                    |
|                          | 0.093666                | Valence band top | 0.01288            |

---

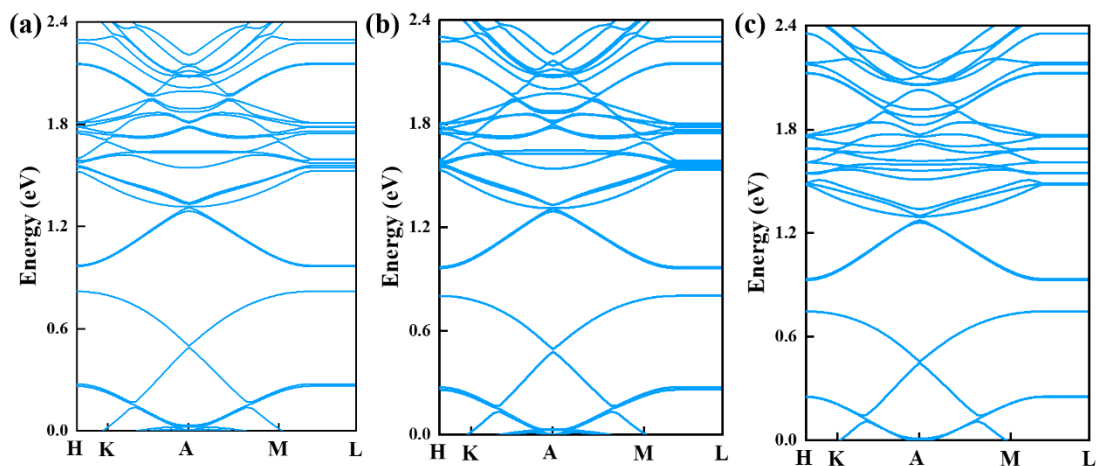

**Fig. S1.** The energy band of the intermediate sites in BN/VS<sub>2</sub> heterostructure adsorbing (a) Li, (b) Na, (c) Mg.

According to the previous calculation, the band gap of the BN/VS<sub>2</sub> heterostructure is 0.07 eV (Fig. 1e and Table S2), indicating the metallic property. Meanwhile, the energy bands of BN/VS<sub>2</sub> heterostructure adsorbed by Li, Na and Mg atoms in the interlayer were calculated (Fig. S1). The results indicated that their band gaps were all 0 eV. The roles of the adsorbent metal atoms were discussed in detail in the charge density (Fig. 3, 4, and Fig. S3). The outer layer of the VS<sub>2</sub> and the adsorbed metal atoms have some free electrons, and when the metal atom is adsorbed to the interlayer, the charge mainly was transferred to the VS<sub>2</sub> side, but a small part of the charge was transferred to the BN side. In this case, the charge of metal atoms not only have a high coincidence degree with V and S atoms in total energy region, but also partly overlaps with those of B and N atoms in low energy region. Due to the above reasons, the band gap of the intercalated heterostructure state is zero with the metallic properties.

**Table S3** Adsorption energies of single Li atom on different sites of BN/VS<sub>2</sub> heterostructure

| Adsorption site | Adsorption energy (eV) |
|-----------------|------------------------|
| a               | -0.535                 |
| b               | -0.862                 |
| c               | -0.660                 |
| d               | -2.352                 |
| e               | -2.375                 |
| f               | -2.376                 |
| g               | -1.401                 |
| h               | -2.112                 |
| i               | -2.113                 |

**Table S4** Adsorption energies of single Na atom on different sites of BN/VS<sub>2</sub> heterostructure

| Adsorption site | Adsorption energy (eV) |
|-----------------|------------------------|
| a               | -1.755                 |
| b               | -1.795                 |
| c               | -1.844                 |
| d               | -3.046                 |
| e               | -3.020                 |
| f               | -3.091                 |
| g               | -2.754                 |
| h               | -3.218                 |
| i               | -3.234                 |

**Table S5** Adsorption energies of single Mg atom on different sites of BN/VS<sub>2</sub> heterostructure

| Adsorption site | Adsorption energy (eV) |
|-----------------|------------------------|
| a               | 1.133                  |
| b               | 1.141                  |
| c               | 1.137                  |
| d               | -1.999                 |
| e               | -2.003                 |
| f               | -2.006                 |
| g               | 0.196                  |
| h               | -1.270                 |
| i               | -1.311                 |

**Table S6** Adsorption energies of Li, Na and Mg atom on interlayer sites of different 2D anodes

| Adsorbed atom | 2D anodes                                        | Interlayer (eV) | Refs.     |
|---------------|--------------------------------------------------|-----------------|-----------|
| Li            | BN/VS <sub>2</sub>                               | -2.38           | This work |
|               | VS <sub>2</sub> /Graphene                        | -1.99           | [1]       |
|               | VS <sub>2</sub> /Blue phosphorene                | -1.80           | [2]       |
|               | MoS <sub>2</sub> /Graphene                       | -1.74           | [3]       |
|               | VS <sub>2</sub> /Ti <sub>2</sub> CO <sub>2</sub> | -2.63           | [4]       |
| Na            | BN/VS <sub>2</sub>                               | -2.23           | This work |
|               | Phosphorene                                      | -1.59           | [5]       |
|               | MoS <sub>2</sub> /Graphene                       | -1.20           | [3]       |
|               | VS <sub>2</sub> /Ti <sub>2</sub> CO <sub>2</sub> | -2.20           | [4]       |
| Mg            | BN/VS <sub>2</sub>                               | -2.0            | This work |
|               | MoS <sub>2</sub> /Graphene                       | -1.89           | [3]       |
|               | VS <sub>2</sub> /Ti <sub>2</sub> CO <sub>2</sub> | -1.80           | [4]       |
|               | monolayer VS <sub>2</sub>                        | -0.58           | [3]       |
|               | VO <sub>2</sub> /VS <sub>2</sub>                 | -4.38           | [6]       |



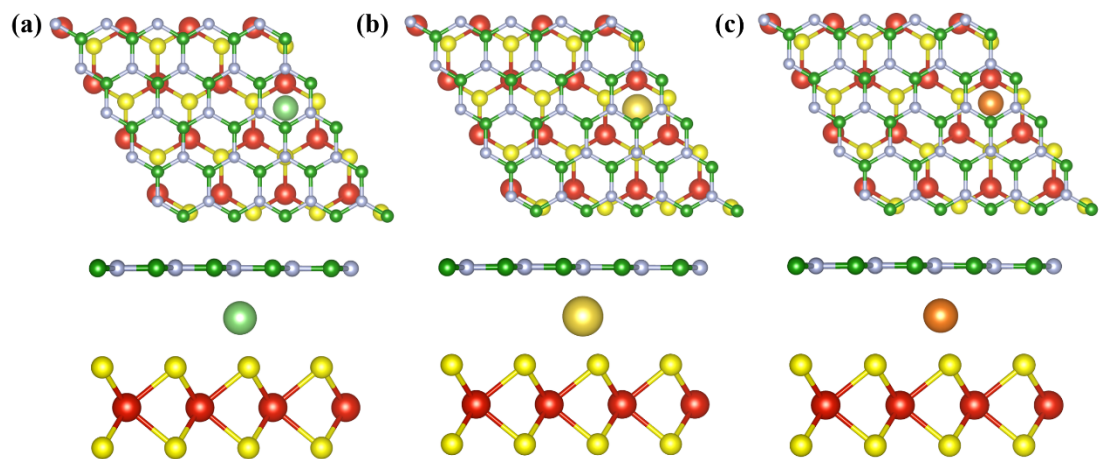

**Fig. S2** (a-c) Top and side view of possible adsorption sites of Li, Na and Mg atoms on BN/VS<sub>2</sub> heterostructure.

**Table S7** Adsorption energies of Li, Na and Mg atom on interlayer sites of different anode models

| Adsorbed atom | 4*4 BN & 3*3 VS <sub>2</sub> | 5*5 BN & 4*4 VS <sub>2</sub> | Difference value |
|---------------|------------------------------|------------------------------|------------------|
| Li            | -2.376 eV                    | -2.473 eV                    | 0.097 eV         |
| Na            | -3.091 eV                    | -3.163 eV                    | 0.072 eV         |
| Mg            | -2.006 eV                    | -2.147 eV                    | 0.141 eV         |

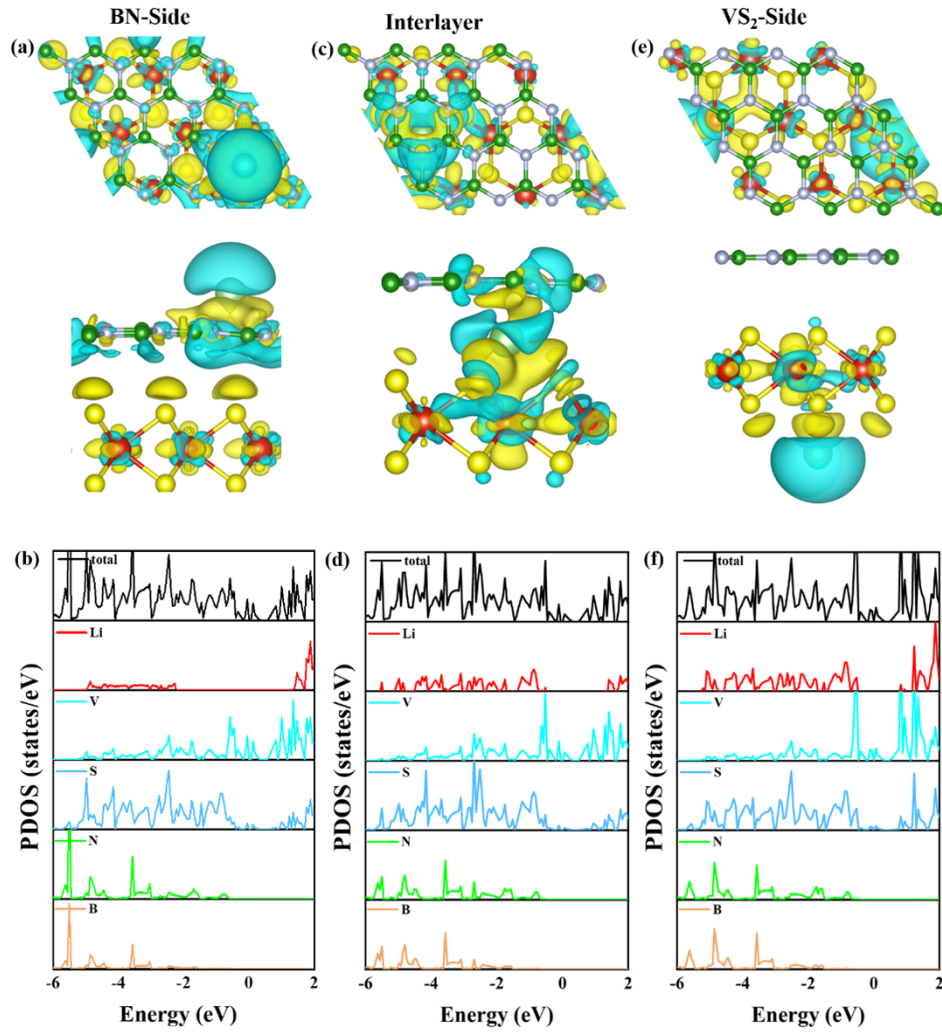

**Fig. S3.** Charge density isosurface configurations of Li adsorbed (a) Li/BN/Vs<sub>2</sub>, (c) BN/Li/Vs<sub>2</sub>, (e) BN/Vs<sub>2</sub>/Li. The isosurface level is set to 0.001 e Å<sup>-3</sup>. Red, yellow, small green, grey, and big green balls represent V, S, B, N, and Li, respectively. Cyan and yellow regions indicate electron depletion and accumulation, respectively. The PDOS of (b) Li/BN/Vs<sub>2</sub>, (d) BN/Li/Vs<sub>2</sub>, (f) BN/Vs<sub>2</sub>/Li.

**Table S8** Electron charge transfer from Li, Na and Mg to the BN/VS<sub>2</sub> heterostructures (unit: e<sup>-</sup> per atom).

| Adsorbed atom | Amount of charge transferred |
|---------------|------------------------------|
| Li            | 0.8546                       |
| Na            | 0.7884                       |
| Mg            | 1.6033                       |

**Table S9** Average adsorption energy of monolayer and multilayer Li atoms on BN/VS<sub>2</sub> heterostructures.

| <b>Layer</b> | <b>E<sub>ad</sub> (eV)</b> |
|--------------|----------------------------|
| First-layer  | -1.97                      |
| Second-layer | -1.62                      |
| Third-layer  | -0.24                      |
| Fourth-layer | -0.17                      |
| Fifth-layer  | 0.04                       |

**Table S10** Average adsorption energy of monolayer and multilayer Na atoms on BN/VS<sub>2</sub> heterostructures.

| <b>layer</b> | <b>E<sub>ad</sub> (eV)</b> |
|--------------|----------------------------|
| First-layer  | -2.630                     |
| Second-layer | -1.2905                    |
| Third-layer  | -0.3097                    |
| Fourth-layer | -0.1420                    |

**Table 11** Average adsorption energy of monolayer and multilayer Mg atoms on BN/VS<sub>2</sub> heterostructures.

| <b>layer</b> | <b>E<sub>ad</sub> (eV)</b> |
|--------------|----------------------------|
| First-layer  | -0.686                     |
| Second-layer | -0.228                     |
| Third-layer  | 0.129                      |

**Table S12** Diffusion energy barrier of atoms along a migration inside the VS<sub>2</sub> in the different 2D materials

| Adsorbed atom | 2D anodes                                        | Interlayer (eV) | Refs.     |
|---------------|--------------------------------------------------|-----------------|-----------|
| Li            | BN/VS <sub>2</sub>                               | 0.13            | This work |
|               | Monolayer VS <sub>2</sub>                        | 0.22            | [7]       |
|               | BN/VS <sub>2</sub>                               | 0.54            | [8]       |
| Na            | BN/VS <sub>2</sub>                               | 0.43            | This work |
|               | Monolayer VS <sub>2</sub>                        | 0.68            | [9]       |
|               | VS <sub>2</sub> /Ti <sub>2</sub> CO <sub>2</sub> | 0.59            | [10]      |
| Mg            | BN/VS <sub>2</sub>                               | 0.56            | This work |
|               | VS <sub>2</sub> /Ti <sub>2</sub> CS <sub>2</sub> | 0.86            | [10]      |
|               | VS <sub>2</sub> /Ti <sub>2</sub> CO <sub>2</sub> | 1.01            | [10]      |
|               | MoS <sub>2</sub>                                 | 1.12            | [11]      |

## References

1. N. S. Mikhaleva, M. A. Visotin, A. A. Kuzubov and Z. I. Popov, *The Journal of Physical Chemistry C*, 2017, **121**, 24179-24184.
2. H. Lin, X. Jin, N. Lou, D. Yang, R. Jin and Y. Huang, *Applied Surface Science*, 2020, **533**.
3. J. Fan, J. Yang, A. Pham and S. Li, *Phys Chem Chem Phys*, 2018, **20**, 18671-18677.
4. N. Li, Y. Li, X. Zhu, C. Huang and J. Fan, *Applied Surface Science*, 2021, **543**.
5. D. G. Ladha, *Materials Today Chemistry*, 2019, **11**, 94-111.
6. L. Luo, S. Tan, Z. Gao, X. Yang, J. Xu, G. Huang, J. Wang and F. Pan, *Physical Chemistry Chemical Physics*, 2023, **25**, 26289.
7. Y. Jing, Z. Zhou, C. R. Cabrera and Z. Chen, *The Journal of Physical Chemistry C*, 2013, **117**, 25409-25413.
8. C. Tang, M. Zhang, K. Zhang and J. Gong, *Applied Surface Science* 2021, **564**, 150468.
9. D. B. Putungan, S. H. Lin and J. L. Kuo, *ACS Appl Mater Interfaces*, 2016, **8**, 18754-18762.
10. N. Li, Y. Li, X. Zhu, C. Huang and J. Fan, *Applied Surface Science*, 2021, **543**.
11. S. Yang, D. Li, T. Zhang, Z. Tao and J. Chen, *Journal of Physical Chemistry C*, 2012, **116**, 1307-1312.
